# Supplementary material for: Strong biomechanical relationships bias the tempo and mode of morphological evolution
Source: eLife journal article supplement (doi:10.7554/elife.37621), 2018-08-09

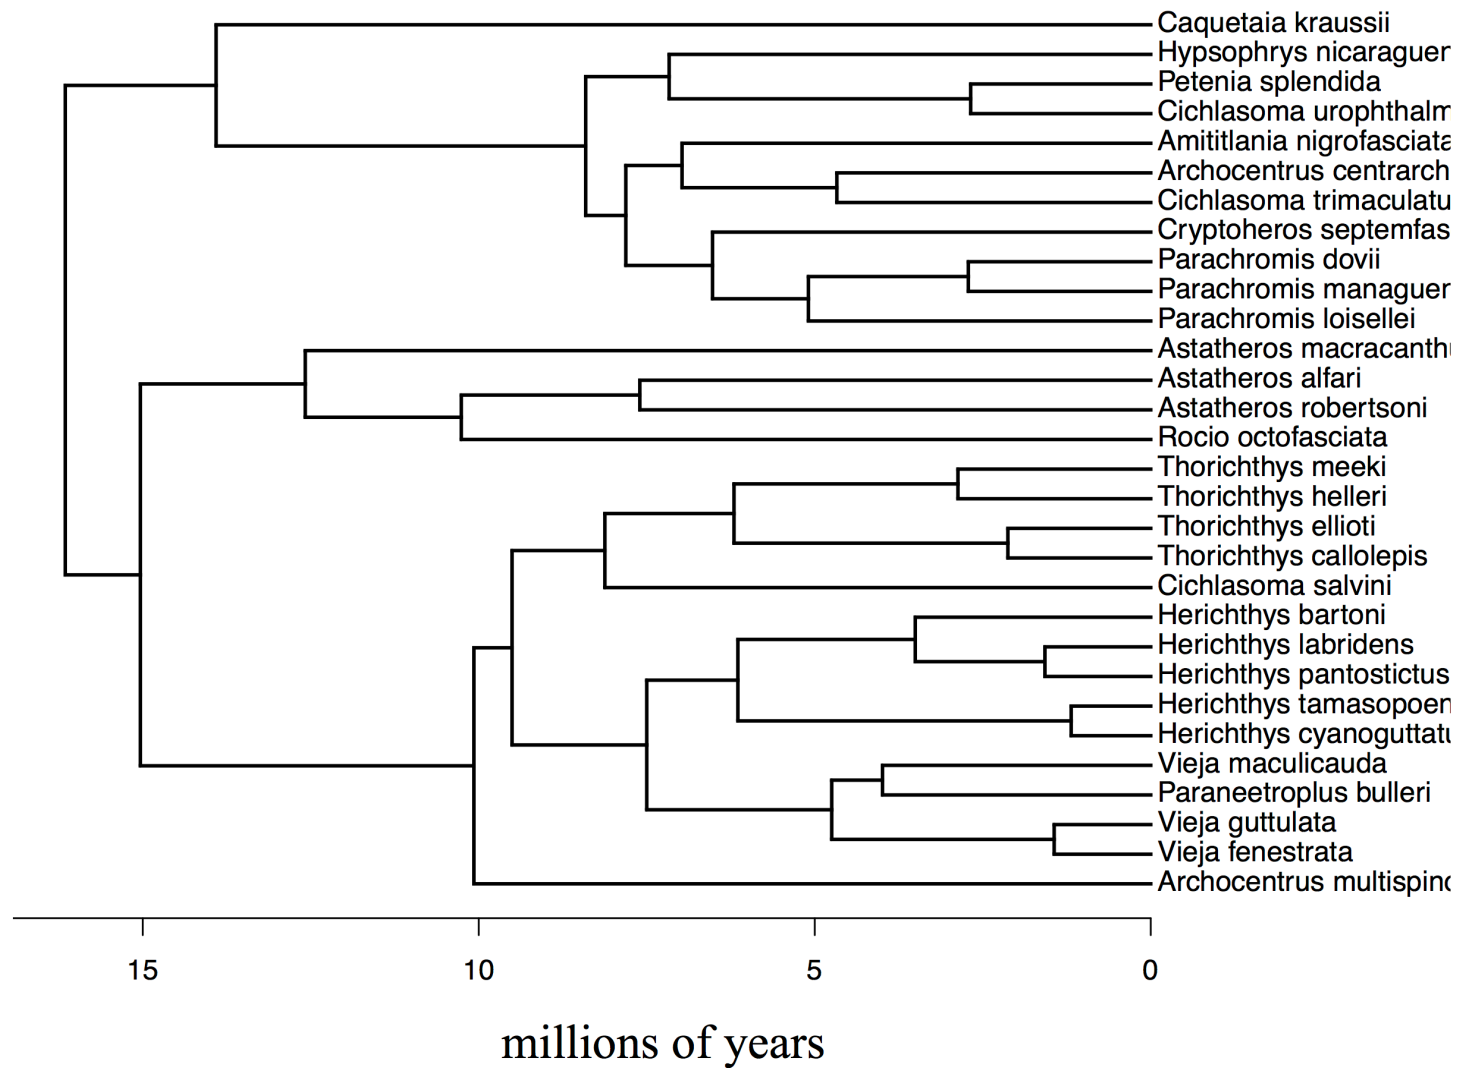

Supplement: supp [file elife_poa_e37621_Supplementary_File_8.pdf › elife_poa_e37621_Supplementary_File_8.pdf]
