# Supplementary figures and images for: Strong biomechanical relationships bias the tempo and mode of morphological evolution
Source: eLife journal article supplement (doi:10.7554/elife.37621), 2018-08-09

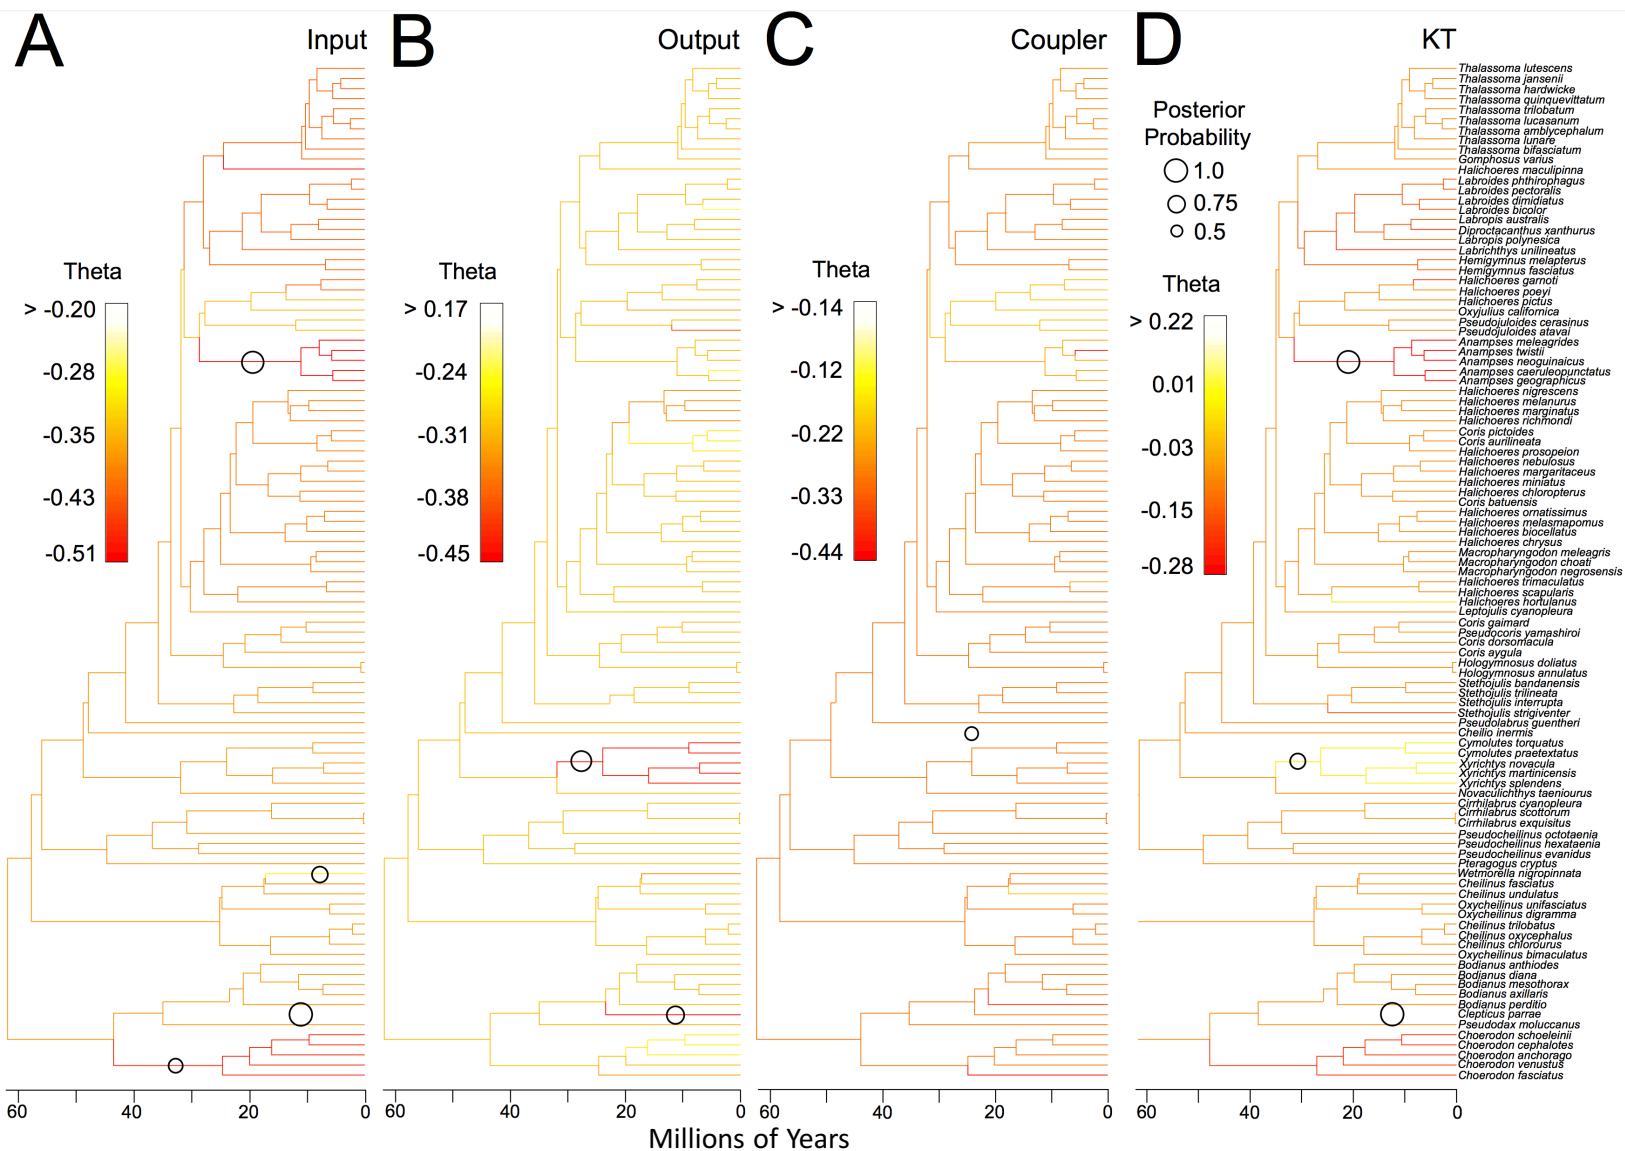

Supplement: supp [file elife_poa_e37621_Figure_3_figure_supplement_1.pdf › elife_poa_e37621_Figure_3_figure_supplement_1.pdf]
